# Supplementary material for: Structural and magnetic investigation of CoII/MnII-based MIL-53 analogues with mixed ligands of neutral N-oxides and organic carboxylates
Source: Royal Society of Chemistry journal article supplement (doi:10.1039/c3ce41824c), 2013-01-01
Supplement: c3ce41824c.pdf [file c3ce41824c.pdf]

## Supplementary Information

# Structural and Magnetic Investigation of Co<sup>II</sup>/Mn<sup>II</sup>-based MIL-53 Analogues with Mixed Ligands of Neutral *N*-oxides and Organic Carboxylates

Yongxin Liu,<sup>a,b</sup> Dan Liu,\*<sup>a</sup> Yang Yu,<sup>a</sup> Jin Xu,<sup>a</sup> Xiaohui Han<sup>a,b</sup>  
and Cheng Wang\*<sup>a</sup>

<sup>a</sup> State Key Laboratory of Rare Earth Resources Utilization, Changchun Institute of Applied Chemistry, Chinese Academy of Sciences, 5625 Renmin Street, Changchun, Jilin 130022 (P.R. China).

<sup>b</sup> University of the Chinese Academy of Science, Beijing 100049 (P.R. China)

Corresponding authors. E-mail: [cwang@ciac.ac.cn](mailto:cwang@ciac.ac.cn) and [liudan2007@ciac.ac.cn](mailto:liudan2007@ciac.ac.cn); Fax: +86-431-85698041; Tel: 86-431-85262770;

## Contents

- Fig. S1** Thermal ellipsoid of crystal structures with detailed labels in **1–3**.
- Fig. S2** The  $\pi$ - $\pi$  interactions between adjacent pyridine rings in **1–3**. The centroid-centroid and planar distances of adjacent  $\mu_2$  pyridine rings are 4.06/3.61 Å for **1** (a) and 4.93/(3.53, 3.66) Å for **2** (b). The numbers in parenthesis means there are two values for each of those cases. The closest centroid-centroid distance of pyridine rings is 4.606Å for **3** (c).
- Fig. S3** Temperature dependence of the inverse susceptibility for **1–5**, as measured in an applied field of 1000 Oe. The solid line represents the best fit to the data.
- Fig. S4** Thermal dependence of the ac susceptibilities at different frequencies (a) for **1** and (b) for **2**, respectively.
- Fig. S5** The powder magnetization ( $M$ ) vs. field ( $H$ ) hysteresis loops at 2 K for **1** and **2**, respectively.
- Fig. S6** The coordination environments of the cobalt ions in **1** (a), **2** (b) and **3** (c).
- Fig. S7** Temperature dependence of  $\chi_m T$  in **4** and **5** measured at 1000 Oe.
- Fig. S8** The powder magnetization ( $M$ ) vs. field ( $H$ ) for **4** and **5**.
- Fig. S9** Powder and simulated XRD patterns of compounds **1–5**.
- Fig. S10** TGA curves of **1** and **2** at the heating rate of 10 °C per min.
- Fig. S11** IR spectra of the complexes for **1** and **2**.

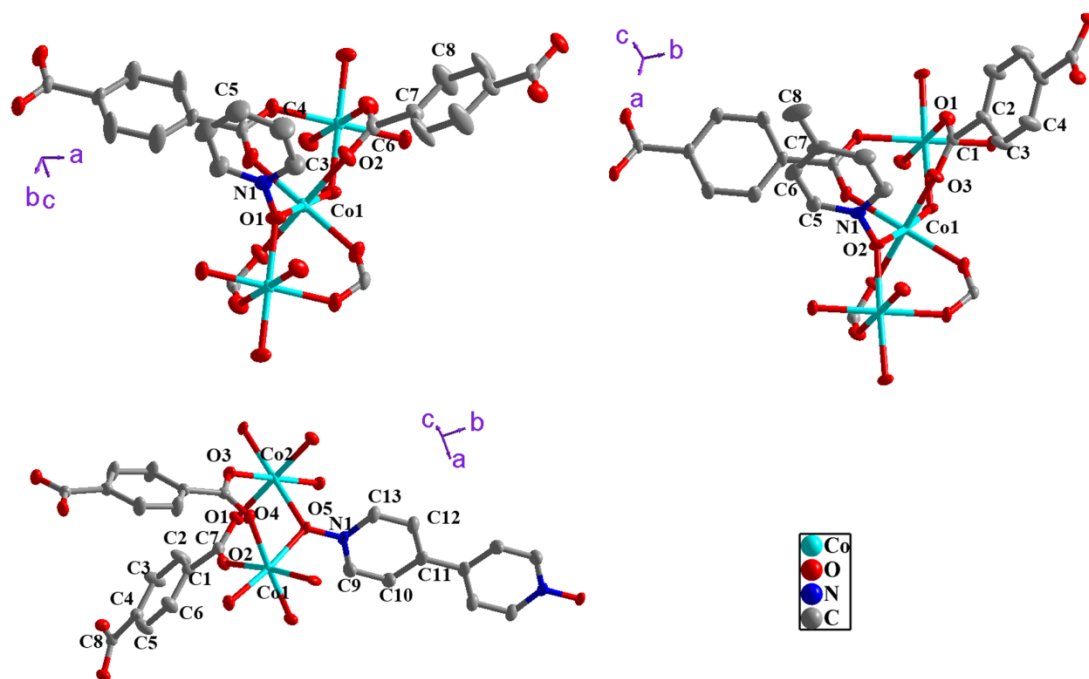

**Fig. S1** Thermal ellipsoid of crystal structures with detailed labels in 1–3.

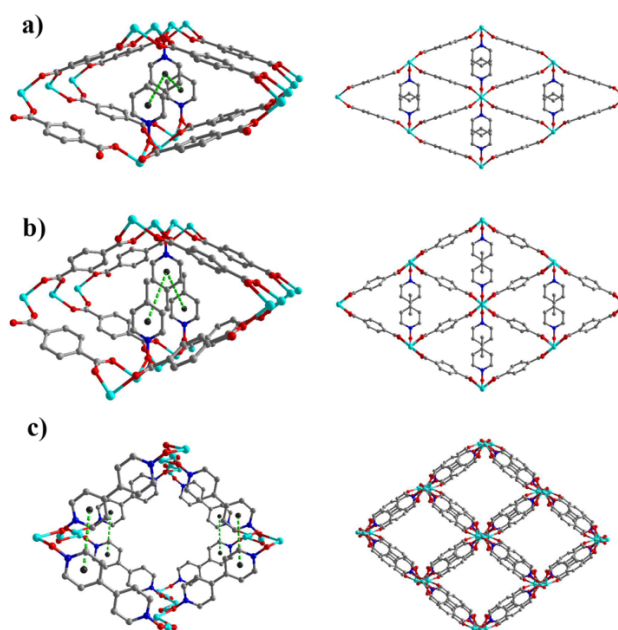

**Fig. S2** The  $\pi$ - $\pi$  interactions between adjacent pyridine rings in 1–3. The centroid-centroid and planar distances of adjacent  $\mu_2$  pyridine rings are 4.06/3.61 Å for 1 (a) and 4.93/(3.53, 3.66) Å for 2 (b). The numbers in parenthesis means there are two values for each of those cases. The closest centroid-centroid distance of pyridine rings is 4.606 Å for 3 (c).

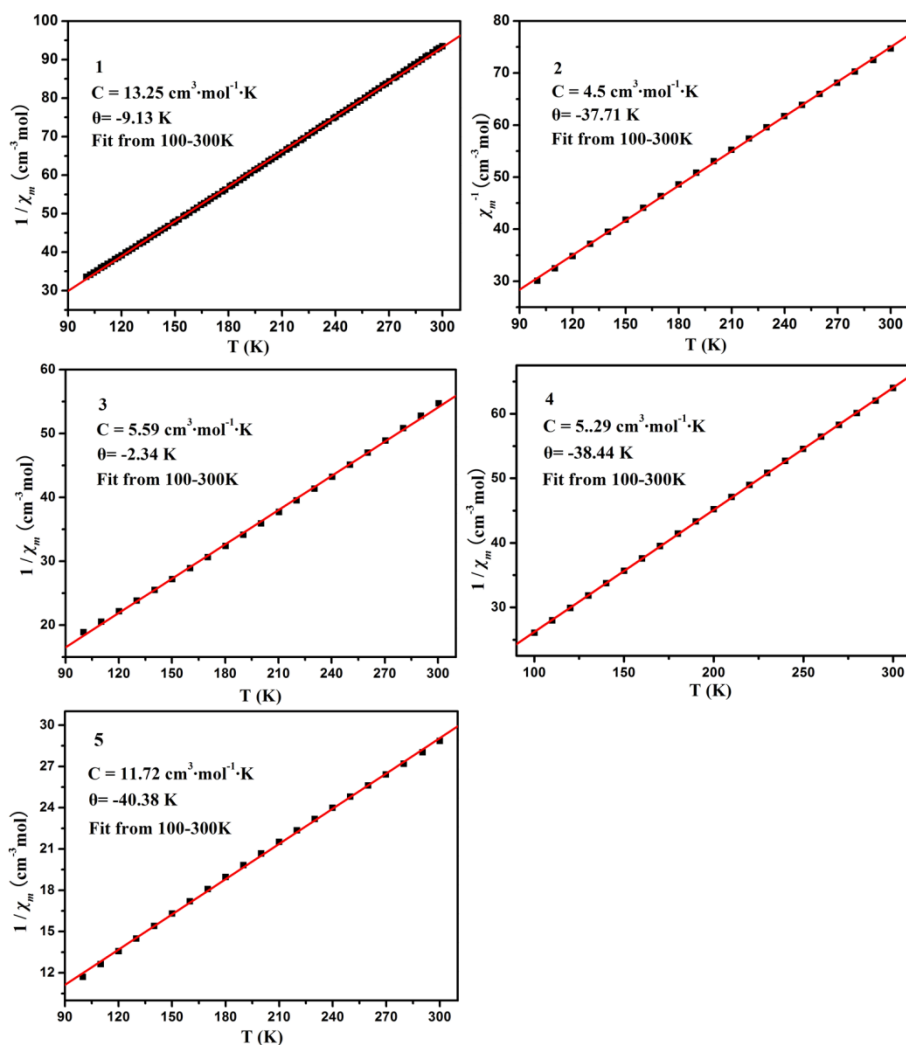

**Fig. S3** Temperature dependence of the inverse susceptibility for 1–5, as measured in an applied field of 1000 Oe. The solid line represents the best fit to the data.

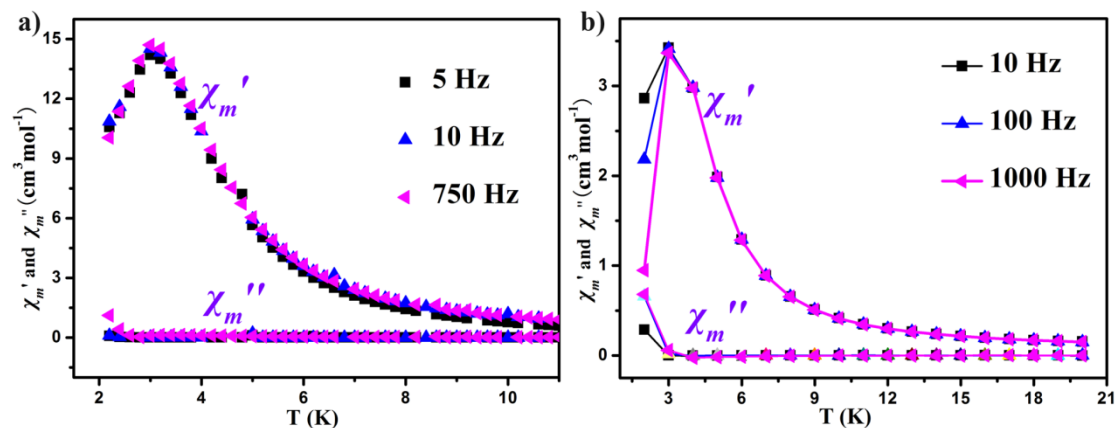

**Fig. S4** Thermal dependence of the ac susceptibilities at different frequencies (a) for 1 and (b) for 2, respectively.

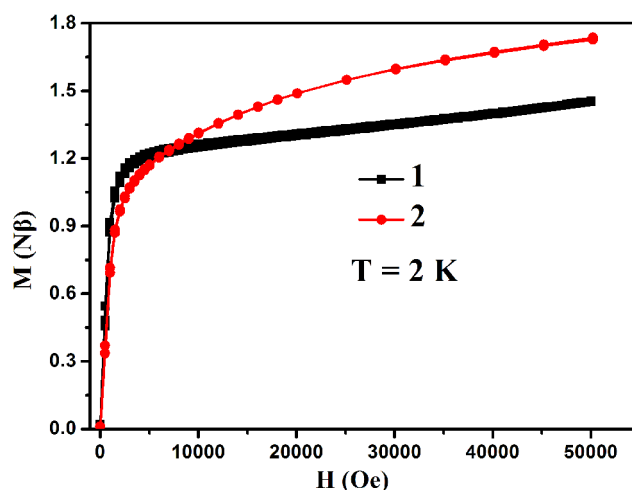

**Fig. S5** The powder magnetization ( $M$ ) vs. field ( $H$ ) hysteresis loops at 2 K for **1** and **2**, respectively.

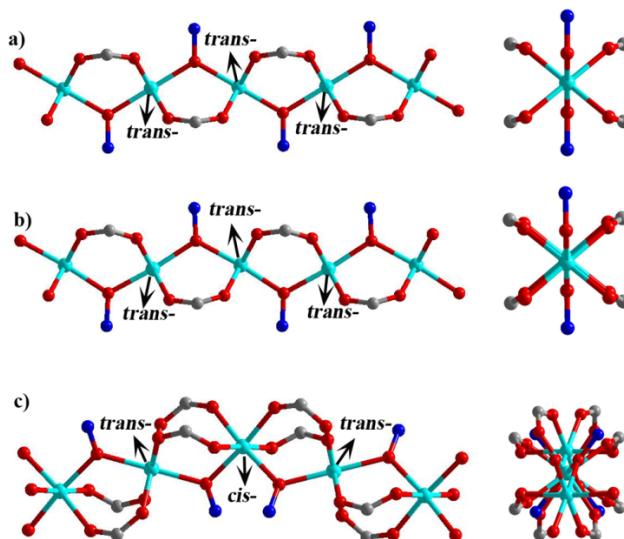

**Fig. S6** The coordination environments of the cobalt ions in **1** (a), **2** (b) and **3** (c) (BDC ligands truncated for clarity).

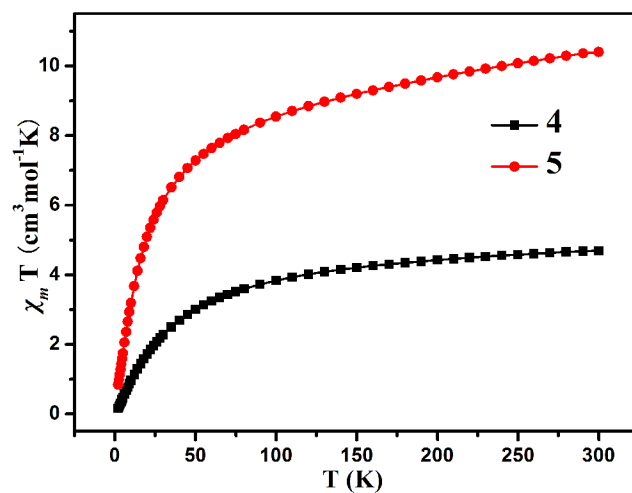

**Fig. S7** Temperature dependence of  $\chi_m T$  in **4** and **5** measured at 1000 Oe.

Plot of  $\chi_m T$  vs.  $T$  for **4** is shown in Fig. S7. This plot is the typical for a simple antiferromagnetic system, without any other important features.  $\chi_m T$  value (for one Mn(II) ion) is  $4.69 \text{ cm}^3 \text{ mol}^{-1} \text{ K}$  for **4** at 300 K, typical value for one Mn(II) ion with  $g > 2.00$ , and decreases in an unremarkable fashion to  $0.16 \text{ cm}^3 \text{ mol}^{-1} \text{ K}$  at 2 K. The Curie–Weiss fits of the inverse magnetic susceptibility above 100 K provide  $C = 5.29 \text{ cm}^3 \text{ mol}^{-1} \text{ K}$ ,  $\theta = -38.44 \text{ K}$  (Fig. S3). Furthermore, the plot of magnetization ( $M$ ) vs. field ( $H$ ) at 2 K (Fig. S8) is clearly indicative of this antiferromagnetic coupling.

As shown in Fig. S7, the  $\chi_m T$  value of compound **5** is  $10.40 \text{ cm}^3 \text{ mol}^{-1} \text{ K}$  at 300 K, which is much higher than the spin-only to the theoretical spin-only value of  $8.75 \text{ cm}^3 \text{ mol}^{-1} \text{ K}$  on the basis of two high-spin octahedral Mn(II) ions ( $S = 5/2$ ,  $g = 2.00$ ). Upon further cooling, the  $\chi_m T$  value abruptly decreases to a minimum value of  $0.85 \text{ cm}^3 \text{ mol}^{-1} \text{ K}$  at 2 K. Magnetic studies show that complex **5** is a typical antiferromagnetic compound with the intrachain antiferromagnetic coupling between adjacent Mn(II) ions, even if a contribution from the spin-orbit coupling of Mn(II) is also present. The susceptibility data above 100 K were well fitted to the Curie-Weiss law, with  $C = 11.72 \text{ cm}^3 \text{ mol}^{-1} \text{ K}$  and  $\theta = -40.38 \text{ K}$  (Fig. S3). The negative value  $\theta$  indicates an overall antiferromagnetic interaction between the Mn(II) ions. The magnetization versus field measurement (Fig. S8) shows no steps and no hysteresis.

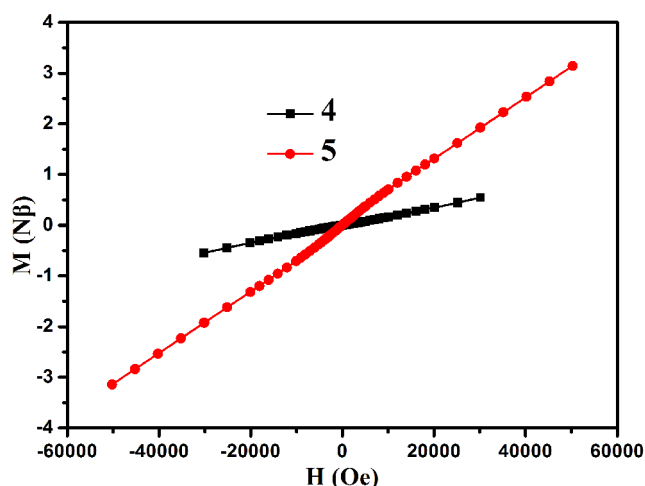

**Fig. S8** The powder magnetization ( $M$ ) vs. field ( $H$ ) for **4** and **5**.

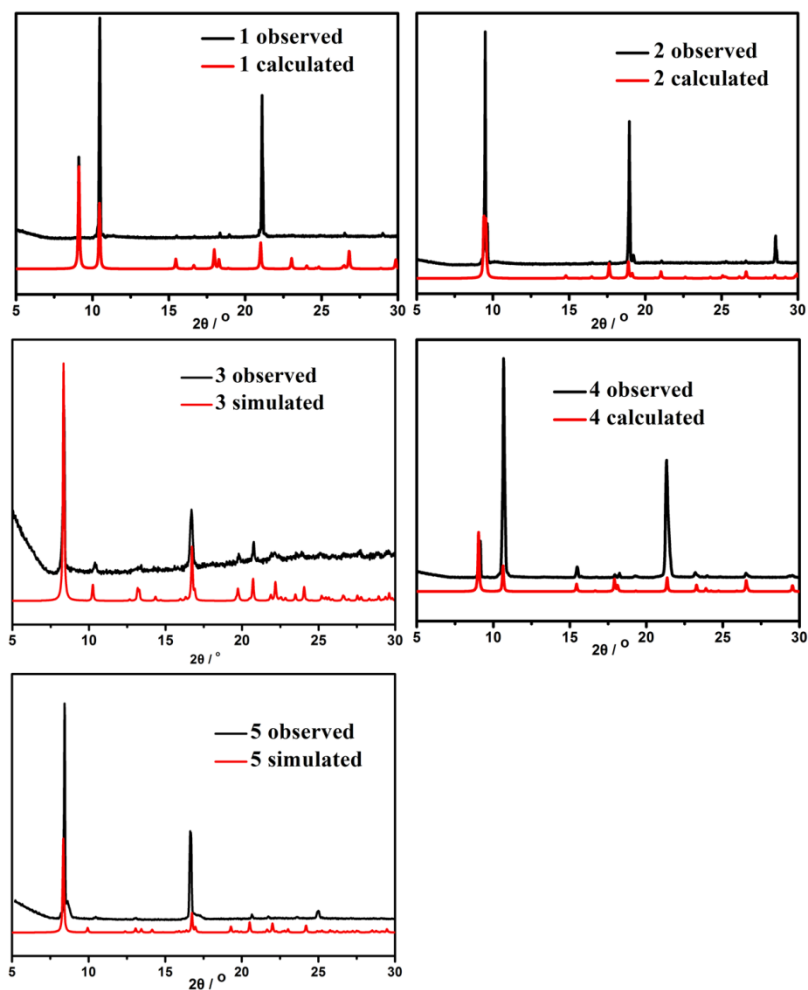

**Fig. S9** Powder and simulated XRD patterns of compounds 1–5.

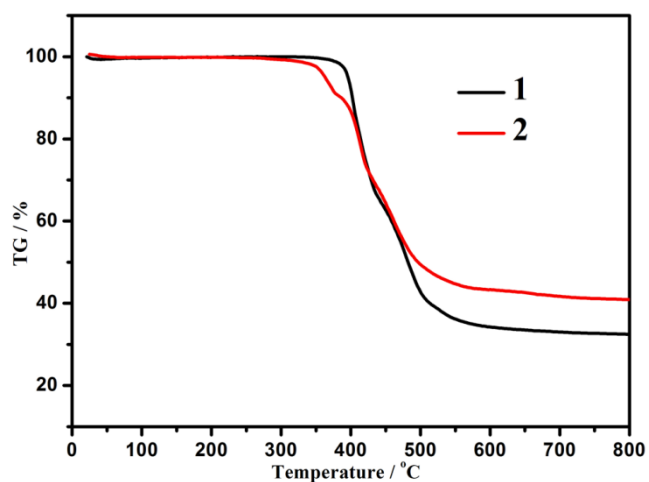

**Fig. S10** TGA curves of 1 and 2 at the heating rate of 10  $^\circ\text{C}$  per min.

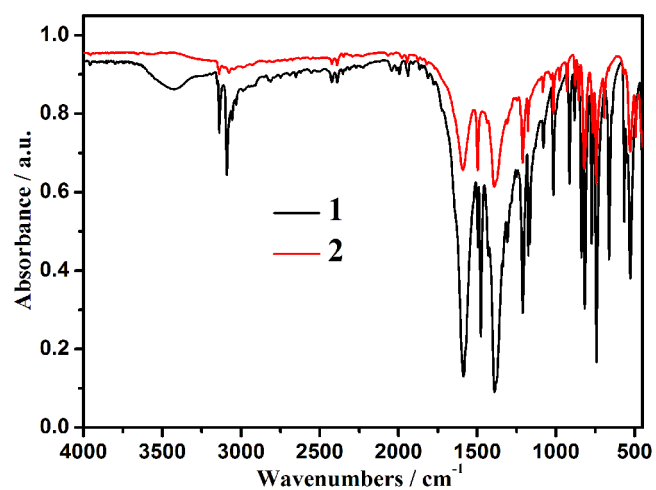

**Fig. S11:** IR spectra of the complexes for **1** and **2**.
